# Supplementary material for: Mapping the immunopeptidome of seven SARS-CoV-2 antigens across common HLA haplotypes
Source: Research Square preprint supplement (doi:10.21203/rs.3.rs-3564516/v1), 2023-11-16
Supplement: Supplementary file 2 [file 44133648047df6cc9403e135.xlsx]

## Sheet: S1_SARS-CoV-2_peptides
								HLA binding prediction using NetMHCpan for class I and NetMHCIIpan
Peptide wo PTM	Peptide	Length	Accession	Cell line	HLA class elution	Experiment (transfection or direct delivery)	FDR cut-off (lowest possible)	HLA-A01:01	HLA-B08:01	HLA-C07:01	HLA-A02:01	HLA-B27:05	HLA-C01:02	DRB1_0101	HLA-DQA10101-DQB10501	HLA-DPA10103-DPB10401	HLA-DPA10103-DPB10301	HLA-DQA10501-DQB10201	DRB3_0101	DRB1_0301	-10LgP	Mass	ppm	m/z	z	RT	1/k0 Range	Area	Intensity	#Spectra	PTM	AScore
ALWEIQQVV	A(+27.99)LWEIQQVV	9	SARS_CoV_2_nsp8	9004	I	TF	5pcFDR				0.0074										16.5	1112.59	-3.1	1113.59	1	47.1231	1.5650-1.5813			2	Formylation	A1:Formylation:1001.00
AAKLMVVI	AAKLM(+15.99)VVI	8	SARS_CoV_2_nsp8	9087	I	TF	1pcFDR														25.65	859.52	-1.8	860.523	1	54.8324	1.4187-1.4351			1	Oxidation (M)	M5:Oxidation (M):1001.00
AAKLMVVI	AAKLMVVI	8	SARS_CoV_2_nsp8	9087	I	TF	5pcFDR														20.63	843.525	-2.7	844.527	1	66.118	1.4128-1.4292			4
ADSKIVQLSEISMDNSPN	ADSKIVQLSEIS(-2.02)MDNSPN	18	SARS_CoV_2_nsp8	9004	II	TF	1pcFDR														22.81	1944.91	-17.4	973.445	2	48.4931	1.1467-1.1633	7240	50600	1	2-amino-3-oxo-butanoic_acid	S12:2-amino-3-oxo-butanoic_acid:0.00
ADSKIVQLSEISM	ADSKIVQLSEISM	13	SARS_CoV_2_nsp8	9004	II	TF	1pcFDR											4.73			26.37	1419.73	5.8	710.875	2	52.2437	0.9882-1.0049	588	10800	2
ADSKIVQLSEISMDN	ADSKIVQLSEISM(+15.99)DN	15	SARS_CoV_2_nsp8	9004	II	TF	1pcFDR							3.71				1.42			38.14	1664.79	-6.2	833.399	2	37.6634	1.0569-1.0736	1560	13400	2	Oxidation (M)	M13:Oxidation (M):1001.00
ADSKIVQLSEISMDNSPN	ADSKIVQLSEISM(+15.99)DNSPN	18	SARS_CoV_2_nsp8	9004	I	TF	1pcFDR														48.52	1962.92	-1.8	982.466	2	39.1437	1.1348-1.1514	991	7380	5	Oxidation (M)	M13:Oxidation (M):1001.00
ADSKIVQLSEISMDNSPN	ADSKIVQLSEISM(+15.99)DNSPN	18	SARS_CoV_2_nsp8	9004	II	TF	1pcFDR														58.56	1962.92	3.2	982.471	2	38.7762	1.1381-1.1547	12300	212000	5	Oxidation (M)	M13:Oxidation (M):1001.00
ADSKIVQLSEISMDN	ADSKIVQLSEISMDN	15	SARS_CoV_2_nsp8	9004	II	TF	1pcFDR							3.71				1.42			46.72	1648.8	4.6	825.41	2	47.991	1.0623-1.0789	409	19700	2
ADSKIVQLSEISMDNSP	ADSKIVQLSEISMDNSP	17	SARS_CoV_2_nsp8	9004	II	TF	1pcFDR											4.86			52.08	1832.88	-0.1	917.448	2	51.3923	1.1128-1.1294	3640	36200	1
ADSKIVQLSEISMDNSPN	ADSKIVQLSEISMDNSPN	18	SARS_CoV_2_nsp8	9004	I	TF	1pcFDR														51.26	1946.93	-0.9	974.469	2	49.0853	1.1401-1.1567	1060	18400	3
ADSKIVQLSEISMDNSPN	ADSKIVQLSEISMDNSPN	18	SARS_CoV_2_nsp8	9004	II	TF	1pcFDR														63.9	1946.93	2.2	974.472	2	48.8025	1.1467-1.1633	60300	2060000	11
AGNGGDAALAL	AGNGGDAALAL	11	SARS_CoV_2_N	9087	II	DD	1pcFDR														20.76	928.461	1.3	929.467	1	33.4583	1.4285-1.4451			1
ALALLLLDRL	ALALLLLDRL	10	SARS_CoV_2_N	9004	I	TF	1pcFDR														23.46	1109.72	1.7	555.867	2	86.4799	0.9034-0.9201	123	3230	2
ALLSDLQDL	ALLSDLQDL	9	SARS_CoV_2_nsp9	9004	I	DD	1pcFDR				0.1537										20.89	986.528	-0.2	987.531	1	73.0897	1.5111-1.5275			1
ALLSDLQDL	ALLSDLQDL	9	SARS_CoV_2_nsp9	9004	I	TF	1pcFDR				0.1537										31.87	986.528	-6.7	987.529	1	72.202	1.2473-1.2638			12
ALLSDLQDLK	ALLSDLQDLK	10	SARS_CoV_2_nsp9	9004	II	DD	5pcFDR														16.49	1114.62	-1.8	558.316	2	51.6241	0.8993-0.9160	1320	9340	1
ALLSDLQDLK	ALLSDLQDLK	10	SARS_CoV_2_nsp9	9004	I	DD	1pcFDR														23.28	1114.62	0.8	558.317	2	51.6214	0.8993-0.9160	1710	24400	2
ALLSDLQDLKWARFPK	ALLSDLQDLKWARFPK	16	SARS_CoV_2_nsp9	9087	II	DD	1pcFDR														38.08	1900.06	-6	634.353	3	66.4243	0.8920-0.9086			2
ALNNIINNA	ALNNIINNA	9	SARS_CoV_2_nsp8	9004	I	TF	1pcFDR				0.2784										25.91	955.509	-0.9	956.515	1	33.6867	1.1421-1.1587			2
ALNNIINNA	ALNNIINNA	9	SARS_CoV_2_nsp8	9004	II	TF	1pcFDR				0.2784										24.13	955.509	0.1	956.516	1	33.311	1.4448-1.4612			1
ALNNIINNARDGCVPL	ALNNIINNARDGCVPL	16	SARS_CoV_2_nsp8	9087	II	TF	1pcFDR														22.21	1695.87	4.7	848.949	2	76.1564	1.0995-1.1162	206	4030	1
ALWEIQQVV	ALW(+15.99)EIQQVV	9	SARS_CoV_2_nsp8	9004	I	TF	5pcFDR				0.0074										17.23	1100.59	-4.5	1101.59	1	55.4503	1.5664-1.5826			1	Oxidation (HW)	W3:Oxidation (HW):1001.00
ALWEIQQVV	ALW(+31.99)EIQQVV	9	SARS_CoV_2_nsp8	9004	I	TF	1pcFDR				0.0074										22.13	1116.58	-2.4	1117.59	1	65.8278	1.5657-1.5820			1	Dihydroxy	W3:Dihydroxy:1001.00
ALWEIQQVV	ALWEIQ(+0.98)QVV	9	SARS_CoV_2_nsp8	9004	I	TF	5pcFDR				0.0074										17.33	1085.58	9.7	1086.59	1	77.4678	1.5631-1.5794			2	Deamidation (NQ)	Q6:Deamidation (NQ):0.00
ALWEIQQV	ALWEIQQV	8	SARS_CoV_2_nsp8	9004	I	TF	1pcFDR				0.1275										28.44	985.523	7.5	986.538	1	60.9415	1.4874-1.5037			1
ALWEIQQVV	ALWEIQQVV	9	SARS_CoV_2_nsp8	9004	I	TF	1pcFDR				0.0074										35.05	1084.59	4.1	1085.6	1	73.2089	1.5650-1.5813			19
ALWEIQQVVD	ALWEIQQVVD	10	SARS_CoV_2_nsp8	9004	I	TF	5pcFDR				0.8886										15.6	1199.62	3.3	600.818	2	70.1667	0.8971-0.9139	881	5860	1
ALWEIQQVVDADSKIVQL	ALWEIQQVVDADSKIVQL	18	SARS_CoV_2_nsp8	9004	I	TF	1pcFDR				0.7317									0.67	49.56	2054.1	6.1	1028.07	2	92.8831	1.1911-1.2077	167	3360	3
AMQTMLFTM	AM(+15.99)QTM(+15.99)LFTM(+15.99)	9	SARS_CoV_2_nsp8	9004	I	TF	1pcFDR				1.0575										33.82	1120.46	2.7	1121.47	1	28.1988	1.5657-1.5820			2	Oxidation (M); Oxidation (M); Oxidation (M)	M2:Oxidation (M):1001.00;M5:Oxidation (M):1001.00;M9:Oxidation (M):1001.00
AMQTMLFTM	AMQTMLFTM	9	SARS_CoV_2_nsp8	9004	I	TF	1pcFDR				1.0575										26.6	1072.48	2	1073.48	1	72.0119	1.5644-1.5807			1
AQEAYEQAV	AQEAYEQAV	9	SARS_CoV_2_nsp8	9004	I	TF	5pcFDR														19.48	1007.46	-7.8	1008.46	1	16.8764	1.4651-1.4815			2
ASEFSSLPSY	ASEFSSLPSY	10	SARS_CoV_2_nsp8	9087	II	TF	1pcFDR	0.0439													28.03	1086.49	2.2	1087.5	1	58.3644	1.5429-1.5592			1
ASEFSSLPSY	ASEFSSLPSY	10	SARS_CoV_2_nsp8	9087	I	TF	5pcFDR	0.0439													17.26	1086.49	6.1	1087.5	1	59.315	1.5204-1.5368			1
AWPLIVTAL	AWPLIVTAL	9	SARS_CoV_2_nsp8	9004	I	TF	1pcFDR		1.6068				0.2983								27.61	982.585	-1.9	983.591	1	93.0501	1.4913-1.5076			1
AYNVTQAF	AYN(+0.98)VTQAF	8	SARS_CoV_2_N	9004	I	TF	1pcFDR			1.8432											24.93	913.418	2.8	914.428	1	43.34	1.4426-1.4589			3	Deamidation (NQ)	N3:Deamidation (NQ):38.16
CTDDNALAY	C(+42.01)(+45.99)TDDNALAY	9	SARS_CoV_2_nsp9	9087	I	DD	5pcFDR	0.0013		1.2268											11.26	1072.38	-1.7	1073.39	1	81.968	1.5434-1.5598			1	Acetylation (N-term); Beta-methylthiolation	C1:Acetylation (N-term):1001.00;)1:Beta-methylthiolation:1001.00
DYNTYKNTCDGTTFTY	D(+226.08)YNTYK(+42.01)NTCDGTTFTY	16	SARS_CoV_2_nsp8	9087	II	TF	5pcFDR	1.515													15.33	2173.86	-3.8	1087.94	2	54.9543	1.1898-1.2064	761	27600	1	Biotinylation; Acetylation (K)	D1:Biotinylation:1001.00;K6:Acetylation (K):1001.00
DADSKIVQLSEISMDNSPN	DADSKIVQLSEISM(+15.99)DNSPN	19	SARS_CoV_2_nsp8	9004	I	TF	1pcFDR														45.51	2077.95	-8.2	1039.97	2	47.8803	1.1527-1.1693			2	Oxidation (M)	M14:Oxidation (M):1001.00
DADSKIVQLSEISMDNSPN	DADSKIVQLSEISM(+15.99)DNSPN	19	SARS_CoV_2_nsp8	9004	II	TF	1pcFDR														61.96	2077.95	-0.5	1039.98	2	47.6487	1.1467-1.1633	5840	78600	3	Oxidation (M)	M14:Oxidation (M):1001.00
DADSKIVQLSEISMDNSPN	DADSKIVQLSEISMDN(+0.98)SPN	19	SARS_CoV_2_nsp8	9004	II	TF	5pcFDR														15.67	2062.94	8.6	1032.48	2	57.7272	1.1779-1.1945			1	Deamidation (NQ)	N16:Deamidation (NQ):16.66
DADSKIVQLSEISMDNSP	DADSKIVQLSEISMDNSP	18	SARS_CoV_2_nsp8	9004	II	TF	1pcFDR														36.61	1947.91	-1	974.961	2	60.6608	1.1368-1.1533			1
DADSKIVQLSEISMDNSPN	DADSKIVQLSEISMDNSPN	19	SARS_CoV_2_nsp8	9004	II	TF	1pcFDR														65.76	2061.95	-0.4	1031.98	2	57.6719	1.1407-1.1573	6610	116000	5
DDKDPNFK	DDKDPNFK	8	SARS_CoV_2_N	9087	II	TF	5pcFDR														25.68	977.445	-9.4	978.441	1	37.1948	1.4552-1.4716			1
DDNALAYY	DDNALAYY	8	SARS_CoV_2_nsp9	9087	I	DD	1pcFDR														20.83	943.392	-3.3	944.393	1	42.53	1.4305-1.4470			2
DDNALAYY	DDNALAYY	8	SARS_CoV_2_nsp9	9087	II	TF	1pcFDR														24.18	943.392	0.7	944.4	1	41.4179	1.4386-1.4551			4
DDNALAYY	DDNALAYY	8	SARS_CoV_2_nsp9	9087	I	TF	5pcFDR														17.02	943.392	-3.6	944.399	1	41.2904	1.4227-1.4391			3
DKDPNFKDQ	DKDPNFKDQ	9	SARS_CoV_2_N	9087	II	TF	5pcFDR														26.91	1105.5	-2.8	553.756	2	38.4357	0.8477-0.8644	897	26600	2
DKRAKVTSAMQ	DKRAKVTSAMQ	11	SARS_CoV_2_nsp8	9087	II	TF	5pcFDR														13.06	1233.65	7.3	412.228	3	13.2824	0.7571-0.7740			1
DLQDLKWARFPK	DLQDLKWARFPK	12	SARS_CoV_2_nsp9	9004	II	TF	1pcFDR														27.88	1515.82	6.6	506.284	3	47.762	0.7538-0.7707	874	19700	3
DPNFKDQVILLNKHIDAYK	DPNFKDQVILLNKHIDAYK	19	SARS_CoV_2_N	9004	II	TF	5pcFDR														17.67	2270.21	0.9	568.559	4	46.0843	0.8536-0.8705			1
DSKIVQLSEISMDNSPN	DSKIVQLSEISM(+15.99)DNSPN	17	SARS_CoV_2_nsp8	9004	II	TF	5pcFDR														15.68	1891.88	1	946.95	2	41.8411	1.1068-1.1235	340	3290	1	Oxidation (M)	M12:Oxidation (M):1001.00
DSKIVQLSEISMDNSP	DSKIVQLSEISMDNSP	16	SARS_CoV_2_nsp8	9004	II	TF	1pcFDR							4.4				2.9			21.06	1761.85	2.1	881.932	2	54.6992	1.0962-1.1128			1
DSKIVQLSEISMDNSPN	DSKIVQLSEISMDNSPN	17	SARS_CoV_2_nsp8	9004	II	TF	1pcFDR														49.15	1875.89	-0.3	938.951	2	52.0578	1.1328-1.1494	6740	214000	4
DSVEEVLSEARQHLK	DSVEEVLSEARQHLK	15	SARS_CoV_2_nsp1	9087	II	DD	1pcFDR													2.74	20.57	1738.88	1.1	580.636	3	51.0383	0.8459-0.8626	620	8170	1
DSVEEVLSEARQHLKDG	DSVEEVLSEARQHLKDG	17	SARS_CoV_2_nsp1	9087	II	DD	1pcFDR													1.8	30.06	1910.93	-1	637.984	3	54.5085	0.8859-0.9026	3270	18200	1
DTPKGPKVKYLYFIKGLNNLNRG	DTPKGPKVKYLYFIKGLNNLNRG	23	SARS_CoV_2_nsp9	9087	II	TF	1pcFDR														32.19	2634.46	1.8	527.901	5	44.6295	0.8653-0.8820	423	6080	1
DVLLPLTQYNRY	DVLLPLTQYNRY	12	SARS_CoV_2_nsp4	9004	II	DD	1pcFDR														29.29	1493.79	1.4	747.9	2	64.5122	0.9862-1.0029	4110	88200	3
EVLSEARQHLKD	E(-18.01)VLSEARQHLKD	12	SARS_CoV_2_nsp1	9087	II	DD	1pcFDR														26.44	1405.73	0.8	469.585	3	13.3815	0.7616-0.7783			1	Pyro-glu from E	E1:Pyro-glu from E:1001.00
EVLSEARQHLKDG	E(-18.01)VLSEARQHLKDG	13	SARS_CoV_2_nsp1	9087	II	DD	1pcFDR														41.74	1462.75	1	488.592	3	14.1703	0.7663-0.7830	14800	135000	1	Pyro-glu from E	E1:Pyro-glu from E:1001.00
EEVLSEARQHLKDG	EEVLSEARQHLKDG	14	SARS_CoV_2_nsp1	9087	II	DD	1pcFDR													2.23	47.51	1609.81	-4	805.907	2	24.8435	1.0493-1.0659	768	19700	3
EVLSEARQHLK	EVLSEARQHLK	11	SARS_CoV_2_nsp1	9087	II	DD	1pcFDR														34.39	1308.71	-0.6	655.364	2	10.9618	0.9727-0.9893	322	6830	2
EVLSEARQHLKD	EVLSEARQHLKD	12	SARS_CoV_2_nsp1	9087	II	DD	1pcFDR														42.66	1423.74	-5.1	712.875	2	13.424	1.0147-1.0313	176	2690	1
EVLSEARQHLKDG	EVLSEARQHLKDG	13	SARS_CoV_2_nsp1	9087	II	DD	1pcFDR														46.72	1480.76	-0.6	741.389	2	24.7521	1.0340-1.0506	2470	21600	2
EVLSEARQHLKDGT	EVLSEARQHLKDGT	14	SARS_CoV_2_nsp1	9087	II	DD	1pcFDR														51.16	1581.81	-5.4	791.909	2	16.3796	1.0346-1.0513	7030	83000	4
FGMSRIGM	FGM(+15.99)SRIGM(+15.99)	8	SARS_CoV_2_N	9087	I	TF	5pcFDR		0.7738												15.84	929.41	3.5	465.712	2	22.7327	0.7839-0.8007	93500	217000	2	Oxidation (M); Oxidation (M)	M3:Oxidation (M):1001.00;M8:Oxidation (M):1001.00
FGMSRIGM	FGMSRIGM	8	SARS_CoV_2_N	9087	I	TF	1pcFDR		0.7738												24.69	897.42	1.1	449.716	2	49.4314	0.7853-0.8020	951	20200	1
FLLNKEMYL	FLLNKEM(+15.99)YL	9	SARS_CoV_2_nsp4	9004	I	DD	1pcFDR		0.1025	0.5774	0.0083		0.2975								24.8	1185.61	0	593.812	2	48.0401	0.9048-0.9215	7770	22300	1	Oxidation (M)	M7:Oxidation (M):1001.00
FLLNKEMYL	FLLNKEMYL	9	SARS_CoV_2_nsp4	9004	II	DD	1pcFDR		0.1025	0.5774	0.0083		0.2975								31.42	1169.62	-0.8	585.813	2	59.032	0.8894-0.9061	1900	14100	1
FSGAMDTTSY	FSGAM(+15.99)DTTSY	10	SARS_CoV_2_nsp4	9087	I	DD	5pcFDR	0.1523													11.5	1094.42	-2.4	1095.43	1	19.3059	1.5176-1.5341			2	Oxidation (M)	M5:Oxidation (M):1001.00
FSGAMDTTSY	FSGAMDTTSY	10	SARS_CoV_2_nsp4	9087	I	DD	1pcFDR	0.1523													40.56	1078.43	-1.3	1079.43	1	31.041	1.5130-1.5295			2
FSKQLQQSM	FSKQLQQSM	9	SARS_CoV_2_N	9087	I	TF	1pcFDR		0.232	0.5326			0.733								27.07	1095.54	-2.5	1096.54	1	21.147	1.5670-1.5833			1
FVSEETGTL	FVSEETGTL	9	SARS_CoV_2_E	9004	I	TF	1pcFDR			1.7267	0.7643		0.2423								29.47	981.466	-4.3	982.469	1	30.9104	1.4706-1.4871			3
GAIKLDDKD	GAIKLDDKD(-18.01)	9	SARS_CoV_2_N	9087	II	TF	5pcFDR														16.38	955.497	4.5	956.506	1	37.2901	1.4440-1.4605			3	Dehydration	D9:Dehydration:22.85
GAIKLDDKDPNFK	GAIKLDDKDPNFK	13	SARS_CoV_2_N	9087	I	TF	1pcFDR												2.76	0.36	42.43	1459.77	-9.8	730.88	2	38.1617	1.0141-1.0308			1
GAIKLDDKDPNFK	GAIKLDDKDPNFK	13	SARS_CoV_2_N	9087	II	TF	5pcFDR												2.76	0.36	46.78	1459.77	7.7	730.895	2	32.2257	1.0268-1.0435	1360	20000	3
GAIKLDDKDPNFKD	GAIKLDDKDPNFKD	14	SARS_CoV_2_N	9087	II	TF	5pcFDR												2.44	0.26	47.61	1574.79	-4.3	525.935	3	33.1446	0.7799-0.7967	588	7820	3
GAIKLDDKDPNFKDQ	GAIKLDDKDPNFKDQ	15	SARS_CoV_2_N	9087	II	DD	1pcFDR												2.86	0.33	53.28	1702.85	-4.3	852.427	2	24.2063	1.0992-1.1158			1
GAIKLDDKDPNFKDQ	GAIKLDDKDPNFKDQ	15	SARS_CoV_2_N	9087	I	TF	1pcFDR												2.86	0.33	43.18	1702.85	-7.1	852.428	2	26.231	1.0779-1.0945	1680	15500	5
GAIKLDDKDPNFKDQ	GAIKLDDKDPNFKDQ	15	SARS_CoV_2_N	9087	II	TF	5pcFDR												2.86	0.33	52.92	1702.85	-1.6	568.622	3	32.4577	0.8114-0.8282	9470	123000	5
GDAALALLLL	GDAALALLLL	10	SARS_CoV_2_N	9004	I	TF	5pcFDR														15.24	968.591	-1.4	969.596	1	79.8311	1.4942-1.5105			2
GMSRIGMEV	GM(+15.99)SRIGM(+15.99)EV	9	SARS_CoV_2_N	9004	I	TF	1pcFDR				0.4967										19.61	1010.45	2	506.235	2	4.9298	0.7917-0.8085	7250	52300	2	Oxidation (M); Oxidation (M)	M2:Oxidation (M):1001.00;M7:Oxidation (M):1001.00
GMSRIGMEV	GM(+15.99)SRIGMEV	9	SARS_CoV_2_N	9004	I	TF	1pcFDR				0.4967										21.63	994.458	4.5	498.238	2	17.4804	0.7977-0.8146	974	11500	1	Oxidation (M)	M2:Oxidation (M):30.64
GMVLGSLAAT	GM(+15.99)VLGSLAAT	10	SARS_CoV_2_nsp9	9004	I	DD	5pcFDR														12.31	934.479	0.1	935.483	1	36.6234	1.4385-1.4550			1	Oxidation (M)	M2:Oxidation (M):1001.00
GMVLGSLAATVRL	GM(+15.99)VLGSLAATVRL	13	SARS_CoV_2_nsp9	9004	I	DD	1pcFDR														33.12	1302.73	0.5	652.371	2	62.3676	0.9533-0.9700	1110	11100	2	Oxidation (M)	M2:Oxidation (M):1001.00
GMVLGSLAATVRL	GM(+15.99)VLGSLAATVRL	13	SARS_CoV_2_nsp9	9004	I	TF	1pcFDR														34.07	1302.73	0.5	652.374	2	61.4421	0.9787-0.9954	8150	85200	10	Oxidation (M)	M2:Oxidation (M):1001.00
GMSRIGMEV	GMSRIGM(+15.99)EV	9	SARS_CoV_2_N	9004	I	TF	1pcFDR				0.4967										19.83	994.458	3.7	498.238	2	13.9553	0.8031-0.8200	542	7300	1	Oxidation (M)	M7:Oxidation (M):37.99
GMVLGSLAAT	GMVLGSLAAT	10	SARS_CoV_2_nsp9	9004	I	DD	5pcFDR														11.64	918.484	1.2	919.489	1	50.6923	1.4259-1.4424			1
GMVLGSLAATV	GMVLGSLAATV	11	SARS_CoV_2_nsp9	9004	I	DD	1pcFDR														18.25	1017.55	1.7	1018.56	1	67.7268	1.5434-1.5598			1
GMVLGSLAATVR	GMVLGSLAATVR	12	SARS_CoV_2_nsp9	9087	II	DD	1pcFDR														28.71	1173.65	0.6	587.832	2	47.4634	0.9527-0.9693	970	7840	1
GMVLGSLAATVRL	GMVLGSLAATVRL	13	SARS_CoV_2_nsp9	9004	I	DD	1pcFDR														35.81	1286.74	-1	644.373	2	72.0838	1.0093-1.0260	551	4730	1
GMVLGSLAATVRL	GMVLGSLAATVRL	13	SARS_CoV_2_nsp9	9004	I	TF	1pcFDR														40.84	1286.74	1.8	644.377	2	71.13	1.0347-1.0513	1600	27800	5
GPEAGLPYGANK	GPEAGLPYGANK	12	SARS_CoV_2_N	9004	I	TF	1pcFDR														22.14	1172.58	4.8	587.301	2	18.7665	0.8483-0.8651			1
GPEAGLPYGANK	GPEAGLPYGANK	12	SARS_CoV_2_N	9004	II	TF	1pcFDR														42.42	1172.58	-1	587.299	2	18.6093	0.8489-0.8657	7390	129000	4
GPEAGLPYGANKDG	GPEAGLPYGANKDG	14	SARS_CoV_2_N	9004	I	TF	1pcFDR														42.5	1344.63	1.1	673.323	2	19.8858	0.9235-0.9402	2470	38400	4
GPEAGLPYGANKDG	GPEAGLPYGANKDG	14	SARS_CoV_2_N	9004	II	TF	1pcFDR														58.09	1344.63	4	673.328	2	19.6619	0.9335-0.9503	26100	473000	5
GPKVKYLYFIKGLNNLNRG	GPKVKYLYFIKGLNNLNRG	19	SARS_CoV_2_nsp9	9087	II	TF	1pcFDR														48.91	2193.24	5.6	549.321	4	43.2209	0.8893-0.9060	627	7150	1
GSLAATVRL	GSLAATVRL	9	SARS_CoV_2_nsp9	9004	I	TF	1pcFDR														19.31	886.524	-2.3	887.529	1	52.6445	1.4574-1.4739			1
GTGPEAGLPYGANK	GTGPEAGLPYGANK	14	SARS_CoV_2_N	9004	II	TF	1pcFDR											2.26			49.1	1330.65	1.7	666.336	2	20.9601	0.8967-0.9134	3540	120000	4
GTGPEAGLPYGANKD	GTGPEAGLPYGANKD	15	SARS_CoV_2_N	9004	II	TF	1pcFDR											1.46			48.75	1445.68	1.8	723.85	2	22.4411	0.9389-0.9556	1380	20700	2
GTGPEAGLPYGANKDG	GTGPEAGLPYGANKDG	16	SARS_CoV_2_N	9004	I	TF	1pcFDR											2.36			45.92	1502.7	-0.4	752.357	2	21.9846	0.9643-0.9811	1830	19900	1
GTGPEAGLPYGANKDG	GTGPEAGLPYGANKDG	16	SARS_CoV_2_N	9004	II	TF	1pcFDR											2.36			59.97	1502.7	1.5	752.361	2	21.9677	0.9750-0.9918	17900	342000	3
GVPINTNSSPDDQIG	GVPINTNSSPDDQIG	15	SARS_CoV_2_N	9004	II	TF	1pcFDR											2.87			25.68	1512.71	-2.6	757.361	2	34.84	0.9911-1.0078	447	3470	1
IIWVATEGA	IIW(+3.99)VATEGA	9	SARS_CoV_2_N	9004	I	TF	5pcFDR														13.5	962.507	8.2	963.522	1	51.037	1.4360-1.4524			1	Tryptophan oxidation to kynurenin	W3:Tryptophan oxidation to kynurenin:1001.00
IIWVATEGA	IIW(+31.99)VATEGA	9	SARS_CoV_2_N	9004	I	TF	1pcFDR														20.98	990.502	-1.5	991.508	1	46.6838	1.4334-1.4498			1	Dihydroxy	W3:Dihydroxy:1001.00
IIWVATEGA	IIWVATEGA	9	SARS_CoV_2_N	9004	I	TF	1pcFDR														32.5	958.512	3.1	959.523	1	52.0152	1.4262-1.4426			3
IKRSDARTAPHGHVMVEL	IKRSDARTAPHGHVMVEL	18	SARS_CoV_2_nsp1	9087	II	DD	1pcFDR														19.16	2016.07	0.4	505.025	4	11.3987	0.8358-0.8525			1
IQQVVDADSKIVQ	IQQVVDADSKIVQ	13	SARS_CoV_2_nsp8	9087	II	TF	1pcFDR												5	0.42	43.5	1441.78	0.2	721.898	2	41.3052	1.0303-1.0469	1280	11500	1
IQQVVDADSKIVQLS	IQQVVDADSKIVQLS	15	SARS_CoV_2_nsp8	9087	II	TF	1pcFDR												4.15	0.03	49.53	1641.89	5.5	821.959	2	57.5457	1.0862-1.1029	2840	41500	1
IQQVVDADSKIVQLSE	IQQVVDADSKIVQLSE	16	SARS_CoV_2_nsp8	9087	II	TF	1pcFDR												4.32	0.03	58.19	1770.94	5.6	886.48	2	59.0351	1.1135-1.1301	576	9400	1
IQQVVDADSKIVQLSEI	IQQVVDADSKIVQLSEI	17	SARS_CoV_2_nsp8	9087	II	TF	1pcFDR													0.05	62.07	1884.02	5.7	943.023	2	76.4357	1.1447-1.1613	5820	149000	3
ISMDNSPNL	ISM(+15.99)DNSPNL	9	SARS_CoV_2_nsp8	9004	I	TF	1pcFDR			1.1018	1.2387		0.2066								36.95	1005.44	-4	1006.45	1	17.7589	1.4658-1.4821			9	Oxidation (M)	M3:Oxidation (M):1001.00
IVNVSLVKPSFYVYSRVKNLNSSRVPD	IVNVSLVKPSFYVYSRVKNLNSSRVPD	27	SARS_CoV_2_E	9004	II	TF	5pcFDR														15.72	3079.68	2.4	770.93	4	55.9905	1.0041-1.0207	130	2280	1
IVQLSEISMDNSPN	IVQLSEISMDNSPN	14	SARS_CoV_2_nsp8	9004	II	TF	1pcFDR														32.86	1545.73	7	773.88	2	52.7157	1.0222-1.0389	3000	27000	1
KDPNFKDQ	KDPNFKDQ	8	SARS_CoV_2_N	9087	II	TF	5pcFDR														29.19	990.477	3.8	991.485	1	37.2266	1.4723-1.4887			1
KIVQLSEISMDNSPN	KIVQLSEISM(+15.99)DNSPN	15	SARS_CoV_2_nsp8	9004	I	TF	1pcFDR														35.65	1689.82	0	845.919	2	30.4376	1.0609-1.0776			1	Oxidation (M)	M10:Oxidation (M):1001.00
KIVQLSEISMDNSPN	KIVQLSEISMD(+55.92)NSPN	15	SARS_CoV_2_nsp8	9004	II	TF	1pcFDR														25.65	1729.75	3.2	577.592	3	40.7169	0.8461-0.8629	912	13700	1	Replacement of 2 protons by nickel	D11:Replacement of 2 protons by nickel:6.65
KIVQLSEISMDNSPN	KIVQLSEISMDNSPN	15	SARS_CoV_2_nsp8	9004	I	TF	1pcFDR														32.41	1673.83	-5	837.918	2	41.0673	1.0576-1.0742			1
KIVQLSEISMDNSPN	KIVQLSEISMDNSPN	15	SARS_CoV_2_nsp8	9004	II	TF	1pcFDR														48.33	1673.83	-0.2	837.922	2	40.6624	1.0636-1.0802			1
KLDDKDPNFKDQ	KLDDKDPNFKDQ	12	SARS_CoV_2_N	9087	II	TF	5pcFDR														41.45	1461.71	-1.4	731.859	2	32.4481	1.0001-1.0168	557	8390	1
KPSFYVYSRVKNLNSSRVPD	KPSFYVYSRVKNLNSSRVPD	20	SARS_CoV_2_E	9004	II	TF	1pcFDR														55.61	2355.23	6.1	589.819	4	27.4412	0.8739-0.8906	3760	35800	5
KSDGTGTIY	KSDGTGTIY	9	SARS_CoV_2_nsp9	9087	I	TF	1pcFDR	0.0161		0.7849											21.14	940.45	7.1	941.466	1	5.2678	1.4529-1.4693			1
KSEFDRDAAMQRKLEK	KSEFDRDAAMQRKLEK	16	SARS_CoV_2_nsp8	9087	II	TF	1pcFDR												0.75	0.72	21.13	1950.99	-2.9	651.337	3	21.4746	0.9005-0.9172	256	7580	1
LAILTALRL	LAILTALRL	9	SARS_CoV_2_E	9004	II	TF	1pcFDR														17.03	982.654	2.7	492.336	2	74.927	0.8565-0.8732	2700	11200	1
LALLLLDRLNQLE	LALLLLDRLNQLE	13	SARS_CoV_2_N	9087	II	TF	5pcFDR												4.65		39.21	1522.91	0.2	762.46	2	99.2588	1.0521-1.0688			1
LDDKDPNFK	LDDKDPNFK	9	SARS_CoV_2_N	9087	II	TF	5pcFDR														26.85	1090.53	-6.2	1091.53	1	37.2266	1.5701-1.5865			1
LDDKDPNFKDQ	LDDKDPNFKDQ	11	SARS_CoV_2_N	9087	II	TF	5pcFDR														41.55	1333.62	1.4	667.814	2	32.4474	0.9587-0.9754	752	10400	1
LDRLNQLESK	LDRLNQLESK	10	SARS_CoV_2_N	9087	II	DD	1pcFDR					1.2326									26.52	1214.66	1.4	608.337	2	44.6891	0.9487-0.9653	1200	7550	1
LGTGPEAGLPYGANKDG	LGTGPEAGLPYGANKDG	17	SARS_CoV_2_N	9004	I	TF	1pcFDR											3.28			41.67	1615.78	2.3	808.901	2	29.331	1.0265-1.0431	267	3880	1
LGTGPEAGLPYGANKDG	LGTGPEAGLPYGANKDG	17	SARS_CoV_2_N	9004	II	TF	1pcFDR											3.28			49	1615.78	3.1	808.905	2	29.6642	1.0431-1.0598	2600	18300	1
LLDRLNQL	LLDRLNQL	8	SARS_CoV_2_N	9004	I	TF	5pcFDR		0.9011		1.7049										16.04	983.576	-7.7	984.576	1	59.0134	1.4628-1.4792			1
LLLDRLNQL	LLLDRLNQL	9	SARS_CoV_2_N	9087	II	DD	1pcFDR		0.0559	1.1364	0.0208		0.5514								19.48	1096.66	1.1	549.336	2	58.4156	0.8940-0.9106	2400	14500	1
LLLDRLNQL	LLLDRLNQL	9	SARS_CoV_2_N	9004	I	TF	1pcFDR		0.0559	1.1364	0.0208		0.5514								26.09	1096.66	4	549.34	2	59.0211	0.8920-0.9087	143000	1430000	7
LLLDRLNQL	LLLDRLNQL	9	SARS_CoV_2_N	9004	II	TF	1pcFDR		0.0559	1.1364	0.0208		0.5514								24.86	1096.66	-3.2	549.336	2	58.4885	0.8745-0.8913	226	4040	1
LLLDRLNQLE	LLLDRLNQLE	10	SARS_CoV_2_N	9004	I	TF	5pcFDR														14.28	1225.7	1.7	613.86	2	57.6076	0.9094-0.9262	766	9270	1
LLLDRLNQLES	LLLDRLNQLES	11	SARS_CoV_2_N	9087	II	DD	1pcFDR														21.78	1312.73	-1.9	657.371	2	55.4757	0.9613-0.9780	2730	17700	1
LLLDRLNQLESK	LLLDRLNQLESK	12	SARS_CoV_2_N	9087	II	DD	1pcFDR														37.51	1440.83	-0.8	721.419	2	44.6895	1.0479-1.0646	1350	9540	1
LLNKEMYL	LLNKEMYL	8	SARS_CoV_2_nsp4	9004	I	DD	1pcFDR		1.2431												20.36	1022.55	5.3	1023.56	1	57.9748	1.5635-1.5799			1
LLSDLQDLKWA	LLSDLQDLKWA	11	SARS_CoV_2_nsp9	9004	I	DD	5pcFDR														13.79	1300.7	2.3	651.357	2	68.0824	0.9347-0.9513	65.6	1510	1
LLSDLQDLKWARFPK	LLSDLQDLKWARFPK	15	SARS_CoV_2_nsp9	9004	II	TF	1pcFDR									4.33					21.3	1829.02	-2.4	458.263	4	59.4051	0.7653-0.7822	223	3160	1
LPNNTASWFTALTQHGKED	LPNNTASWFTALTQHGKED	19	SARS_CoV_2_N	9004	II	TF	1pcFDR														45.15	2129.02	-2.3	710.681	3	59.5277	0.9436-0.9603	3570	17700	1
LPNNTASWFTALTQHGKEDL	LPNNTASWFTALTQHGKEDL	20	SARS_CoV_2_N	9004	II	TF	1pcFDR														45.98	2242.1	-3.1	748.372	3	68.3339	0.9670-0.9837	488	4500	1
LPSYAAFATAQEAYEQ	LPSYAAFATAQEAYEQ	16	SARS_CoV_2_nsp8	9004	II	TF	1pcFDR								3.52			0.77			32.51	1758.81	-1.4	880.411	2	60.9691	1.1068-1.1235	959	12500	2
LRSDVLLPLTQYN	LRSDVLLPLTQYN	13	SARS_CoV_2_nsp4	9004	II	DD	1pcFDR														34.52	1530.84	3.6	766.428	2	60.2835	1.0103-1.0269	1200	8480	1
LRSDVLLPLTQYNRY	LRSDVLLPLTQYNRY	15	SARS_CoV_2_nsp4	9004	II	DD	1pcFDR														43.4	1850.01	3.3	617.676	3	55.9244	0.8593-0.8760	7220	52300	3
LRSDVLLPLTQYNRYLA	LRSDVLLPLTQYNRYLA	17	SARS_CoV_2_nsp4	9004	II	DD	1pcFDR														48.2	2034.13	0.8	679.048	3	69.7129	0.8553-0.8720	741	5530	1
LRSDVLLPLTQYNRYLAL	LRSDVLLPLTQYNRYLAL	18	SARS_CoV_2_nsp4	9004	II	DD	1pcFDR														47.18	2147.21	3.3	716.744	3	82.1356	0.8780-0.8947			4
LRSDVLLPLTQYNRYLALYN	LRSDVLLPLTQYNRYLALYN	20	SARS_CoV_2_nsp4	9004	II	DD	1pcFDR														21.01	2424.32	-5.7	809.106	3	81.0316	0.9288-0.9455			1
LSDLQDLKWARFPK	LSDLQ(+0.98)DLKWARFPK	14	SARS_CoV_2_nsp9	9087	II	DD	5pcFDR									3.58					15.74	1716.92	13	573.319	3	47.0551	0.8632-0.8799	192	3330	2	Deamidation (NQ)	Q5:Deamidation (NQ):1001.00
LSDLQDLKW	LSDLQDLKW	9	SARS_CoV_2_nsp9	9087	I	TF	1pcFDR	0.4054													35.96	1116.58	-1.5	559.297	2	52.6225	0.8884-0.9051	379	9710	1
LSDLQDLKWARFPK	LSDLQDLKWARFPK	14	SARS_CoV_2_nsp9	9004	II	DD	1pcFDR									3.58					20.56	1715.94	-11.4	572.977	3	47.7247	0.8325-0.8492			1
LSDLQDLKWARFPK	LSDLQDLKWARFPK	14	SARS_CoV_2_nsp9	9087	II	DD	1pcFDR									3.58					29.39	1715.94	7.5	572.988	3	47.0401	0.8632-0.8799			2
LSDLQDLKWARFPK	LSDLQDLKWARFPK	14	SARS_CoV_2_nsp9	9004	II	TF	1pcFDR									3.58					37.49	1715.94	-0.6	429.991	4	47.8568	0.7349-0.7518	17900	223000	5
LSDLQDLKWARFPK	LSDLQDLKWARFPK	14	SARS_CoV_2_nsp9	9004	I	TF	1pcFDR									3.58					28.51	1715.94	-0.4	572.986	3	46.8054	0.8538-0.8706	853	9150	2
LSEARQHLKDG	LSEARQHLKDG	11	SARS_CoV_2_nsp1	9087	II	DD	1pcFDR														37.62	1252.65	-1.5	627.332	2	14.1609	0.9393-0.9560	4030	48300	3
LVAELEGIQYGR	LVAELEGIQYGR	12	SARS_CoV_2_nsp1	9004	I	DD	5pcFDR														14.72	1346.72	-1.6	674.362	2	44.9259	0.9493-0.9660			1
LVAELEGIQYGR	LVAELEGIQYGR	12	SARS_CoV_2_nsp1	9004	II	DD	1pcFDR														21.72	1346.72	0.3	674.363	2	44.1472	0.9607-0.9773	1040	7990	1
MADQAMTQMY	MADQAMTQMY	10	SARS_CoV_2_nsp8	9087	I	TF	1pcFDR	0.0226													21.45	1188.46	-6.6	1189.45	1	46.9725	1.5747-1.5911			1
MAGNGGDAALAL	MAGNGGDAALAL	12	SARS_CoV_2_N	9087	II	DD	1pcFDR														19.73	1059.5	-8.2	1060.5	1	40.4325	1.5315-1.5480			1
MVLGSLAAT	MVLGSLAAT	9	SARS_CoV_2_nsp9	9004	I	DD	1pcFDR														26.1	861.463	1.3	862.468	1	46.3699	1.3618-1.3783			1
MVLGSLAATV	MVLGSLAATV	10	SARS_CoV_2_nsp9	9004	II	DD	5pcFDR				1.7144										12.56	960.531	9.5	961.545	1	63.9018	1.4734-1.4899			1
MVLGSLAATV	MVLGSLAATV	10	SARS_CoV_2_nsp9	9004	I	DD	1pcFDR				1.7144										24.53	960.531	1.6	961.536	1	63.7831	1.4827-1.4992			3
NTCDGTTFTY	N(+0.98)TC(+58.01)DGTTFTY	10	SARS_CoV_2_nsp8	9087	I	TF	1pcFDR	0.0139													22.71	1180.42	8.4	1181.43	1	68.8784	1.5728-1.5891			1	Deamidation (NQ); Carboxymethyl	N1:Deamidation (NQ):1001.00;C3:Carboxymethyl:1001.00
NTCDGTTFTY	N(+28.03)TCDGTTFTY	10	SARS_CoV_2_nsp8	9087	I	TF	5pcFDR	0.0139													17.17	1149.46	-12.4	1150.45	1	50.3994	1.5577-1.5741			2	Ethylation	N1:Ethylation:22.34
NTCDGTTFTY	N(-17.03)TCDGTTFTY	10	SARS_CoV_2_nsp8	9087	II	TF	1pcFDR	0.0139													32.78	1104.41	-4.2	1105.41	1	47.6532	1.5357-1.5520			1	Ammonia-loss (N)	N1:Ammonia-loss (N):1001.00
NAPRITFGGPSDSTGS	NAPRITFGGPSDSTGS	16	SARS_CoV_2_N	9004	II	TF	1pcFDR														42.33	1562.73	3.3	782.379	2	29.1149	1.0065-1.0231	414	7700	2
NAPRITFGGPSDSTGSN	NAPRITFGGPSDSTGSN	17	SARS_CoV_2_N	9004	II	TF	1pcFDR														53.14	1676.78	3.5	839.401	2	28.3096	1.0385-1.0551	1780	21900	2
NAPRITFGGPSDSTGSNQNG	NAPRITFGGPSDSTGSNQ(+0.98)NG	20	SARS_CoV_2_N	9004	II	TF	1pcFDR														29.16	1976.88	0.3	989.452	2	28.3559	1.1183-1.1349			1	Deamidation (NQ)	Q18:Deamidation (NQ):0.00
NGDSEVVL	NGDSEVVL	8	SARS_CoV_2_nsp8	9004	I	TF	5pcFDR														16.82	831.397	2.7	832.407	1	26.0551	1.3055-1.3219			6
NNLNRGMVLGSLAATVRL	NNLNRGM(+15.99)VLGSLAATVRL	18	SARS_CoV_2_nsp9	9087	II	DD	5pcFDR														13.89	1914.05	1.5	639.021	3	76.1595	0.8405-0.8572			1	Oxidation (M)	M7:Oxidation (M):1001.00
NRGMVLGSLAATVR	NRGMVLGSLAATVR	14	SARS_CoV_2_nsp9	9087	II	DD	1pcFDR										4.73				41.93	1443.8	-2.5	722.902	2	34.8074	1.0160-1.0326	398	6100	2
NSSPDDQIGYY	NSSPDD(+21.98)QIGYY	11	SARS_CoV_2_N	9087	I	TF	1pcFDR	0.0333													26.61	1279.5	2.1	640.757	2	42.9346	0.8685-0.8853	24900	156000	2	Sodium adduct	D6:Sodium adduct:9.34
NSSPDDQIGYY	NSSPDD(+37.95)QIGYY	11	SARS_CoV_2_N	9087	I	TF	5pcFDR	0.0333													14.13	1295.46	6.1	648.742	2	42.8504	0.9014-0.9182	32400	148000	1	Replacement of 2 protons by calcium	D6:Replacement of 2 protons by calcium:12.28
NSSPDDQIGY	NSSPDDQIGY	10	SARS_CoV_2_N	9087	I	TF	1pcFDR	0.1791													26	1094.45	2.3	1095.46	1	28.414	1.4757-1.4920			3
NSSPDDQIGYY	NSSPDDQIGYY	11	SARS_CoV_2_N	9087	I	TF	1pcFDR	0.0333													44.48	1257.51	4	629.767	2	42.7149	0.8813-0.8980	397000	7040000	18
NTCDGTTFTY	NTC(+31.99)DGTTFTY	10	SARS_CoV_2_nsp8	9087	I	TF	5pcFDR	0.0139													14.99	1153.42	-11.3	1154.41	1	47.5355	1.5309-1.5473			1	Dihydroxy	C3:Dihydroxy:60.87
NTCDGTTFTY	NTCDGTTFTY	10	SARS_CoV_2_nsp8	9087	I	TF	5pcFDR	0.0139													18.91	1121.43	-14.2	1122.42	1	48.9602	1.5322-1.5486			3
NTNSSPDDQIGYY	NTNSSPDDQIGYY	13	SARS_CoV_2_N	9087	I	TF	1pcFDR	0.0503													31	1472.61	-3.7	737.307	2	42.9291	0.9584-0.9751	3640	16200	1
PDYNTYKNTCDGTTFTY	P(+27.99)DYNTYK(+42.01)NTCDGTTFTY	17	SARS_CoV_2_nsp8	9087	I	TF	5pcFDR														16.55	2072.83	3.2	1037.42	2	56.7719	1.1425-1.1591	307	3830	1	Formylation; Acetylation (K)	P1:Formylation:1001.00;K7:Acetylation (K):1001.00
PDDQIGYY	PDDQIGYY	8	SARS_CoV_2_N	9087	I	TF	1pcFDR														33.81	969.408	-0.7	970.415	1	42.726	1.3984-1.4148			3
PDYNTYKNTCDGTTFTY	PDYNT(+79.97)YKNTC(+44.03)DGTTFTY	17	SARS_CoV_2_nsp8	9087	I	TF	1pcFDR														22.07	2126.82	-2.5	1064.41	2	69.2045	1.1631-1.1797	1550	8280	1	Phosphorylation (STY); Ethanolation (C)	T5:Phosphorylation (STY):0.00;C10:Ethanolation (C):1000.00
QFAPSASAFF	QFAPSASAFF	10	SARS_CoV_2_N	9087	II	TF	5pcFDR						1.4641								13.44	1071.5	-3.9	1072.5	1	33.1939	1.4940-1.5104			1
RMAGNGGDAALALL	RM(+15.99)AGNGGDAALALL	14	SARS_CoV_2_N	9004	I	TF	5pcFDR														16.61	1344.68	1.8	673.349	2	45.8036	0.9329-0.9496	606	5700	1	Oxidation (M)	M2:Oxidation (M):1001.00
RSDVLLPLTQY	RSDVLLPLTQY	11	SARS_CoV_2_nsp4	9087	I	DD	1pcFDR	0.0814													26.96	1303.71	-2.4	652.862	2	58.18	0.9467-0.9633	514	3600	1
RSDVLLPLTQYNRY	RSDVLLPLTQYNRY	14	SARS_CoV_2_nsp4	9004	II	DD	1pcFDR	0.5835													35.16	1736.92	-4.4	579.977	3	48.8055	0.8064-0.8231	688	13400	2
RVKNLNSSRVPDL	RVKNLNSSRVPDL	13	SARS_CoV_2_E	9004	II	TF	1pcFDR														36.88	1496.84	8.6	499.959	3	13.0074	0.8365-0.8532	1040	7050	1
SDNGPQNQRNAPRITFGGPSDSTGSN	S(+42.01)DNGPQNQRNAPRITFGGPSDSTGSN	26	SARS_CoV_2_N	9004	II	TF	1pcFDR														37.56	2715.22	-0.8	906.084	3	33.7715	0.9516-0.9684	2550	26300	3	Acetylation (Protein N-term)	S1:Acetylation (Protein N-term):1001.00
SDLQDLKWARFPK	SDLQDLKW(+31.99)ARFPK	13	SARS_CoV_2_nsp9	9004	II	TF	5pcFDR									4.35					16.41	1634.84	4.7	545.957	3	41.7986	0.8220-0.8388			1	Dihydroxy	W8:Dihydroxy:6.59
SDLQDLKWARFPK	SDLQDLKWARFPK	13	SARS_CoV_2_nsp9	9004	II	TF	1pcFDR									4.35					36.52	1602.85	6.3	535.295	3	47.7305	0.8079-0.8247			2
SDLQDLKWARFPKSDG	SDLQDLKWARFPKSDG	16	SARS_CoV_2_nsp9	9004	II	TF	1pcFDR									1.52					33.54	1861.93	-1.9	621.653	3	58.4628	0.8368-0.8536	640	4420	1
SDVLLPLTQYNR	SDVLLPLTQYNR	12	SARS_CoV_2_nsp4	9004	II	DD	1pcFDR														19.13	1417.76	-1.6	709.882	2	52.279	0.9589-0.9756	211	2120	1
SDVLLPLTQYNRY	SDVLLPLTQYNRY	13	SARS_CoV_2_nsp4	9004	II	DD	1pcFDR														29.14	1580.82	0.6	791.415	2	61.1887	1.0143-1.0309	2930	46800	3
SDVLLPLTQYNRYLA	SDVLLPLTQYNRYLA	15	SARS_CoV_2_nsp4	9004	II	DD	1pcFDR														22.48	1764.94	1.9	883.477	2	75.8141	1.0795-1.0962	155	1790	1
SEARQHLKDG	SEARQHLKDG	10	SARS_CoV_2_nsp1	9087	II	DD	1pcFDR														34.05	1139.57	-1.9	570.79	2	14.1722	0.8746-0.8913	1980	21000	1
SEISMDNSPN	SEISMDNSPN	10	SARS_CoV_2_nsp8	9004	II	TF	1pcFDR														27.41	1092.44	-1.1	1093.45	1	48.7695	1.4716-1.4880			1
SKIVQLSEISMDNSPN	SKIVQLSEISM(+15.99)DNSPN	16	SARS_CoV_2_nsp8	9004	II	TF	1pcFDR														33.53	1776.86	1.7	889.437	2	32.3265	1.0882-1.1049	434	7410	2	Oxidation (M)	M11:Oxidation (M):1001.00
SKIVQLSEISMDNSPN	SKIVQLSEISMDNSPN	16	SARS_CoV_2_nsp8	9004	II	TF	1pcFDR														55.1	1760.86	-2	881.436	2	42.5636	1.0876-1.1042	2240	33600	2
SPVALRQMSCAAGTTQ	SPVALRQMSC(+119.00)AAGTTQ	16	SARS_CoV_2_nsp9	9087	II	DD	1pcFDR										3.18				50.67	1738.78	-5.1	870.389	2	22.9624	1.1118-1.1284	120	2300	1	Cysteinylation	C10:Cysteinylation:1001.00
SPVALRQMSCAAGTTQ	SPVALRQMSC(+119.00)AAGTTQ	16	SARS_CoV_2_nsp9	9087	II	TF	1pcFDR										3.18				49.5	1738.78	-5.5	870.393	2	22.5874	1.1159-1.1325	614	19300	2	Cysteinylation	C10:Cysteinylation:1001.00
SPVALRQMSCAAGTTQ	SPVALRQMSCAAGTTQ	16	SARS_CoV_2_nsp9	9087	II	TF	1pcFDR										3.18				41.54	1619.78	2.6	810.897	2	27.369	1.0507-1.0673	979	7090	1
SSPDDQIGYY	SSPDDQIGYY	10	SARS_CoV_2_N	9087	I	TF	1pcFDR	0.0141													21.77	1143.47	-12.5	1144.46	1	43.3607	1.5475-1.5638			1
SVEEVLSEARQHLK	SVEEVLSEARQHLK	14	SARS_CoV_2_nsp1	9087	II	DD	5pcFDR													2.76	14.85	1623.86	-1.2	542.293	3	39.2034	0.8245-0.8412	599	6600	1
SVEEVLSEARQHLKDG	SVEEVLSEARQHLKDG	16	SARS_CoV_2_nsp1	9087	I	DD	1pcFDR													1.63	22.69	1795.91	0.2	599.641	3	42.6257	0.8572-0.8739	1350	10500	1
SVEEVLSEARQHLKDG	SVEEVLSEARQHLKDG	16	SARS_CoV_2_nsp1	9087	II	DD	1pcFDR													1.63	27.44	1795.91	-0.3	599.643	3	43.0172	0.8719-0.8886	6580	76800	2
SVEEVLSEARQHLKDGT	SVEEVLSEARQHLKDGT	17	SARS_CoV_2_nsp1	9087	II	DD	1pcFDR													1.99	26.72	1896.95	-2.1	633.324	3	45.217	0.8759-0.8926	1410	10200	1
TCDGTTFTY	T(+42.01)C(+45.99)DGTTFTY	9	SARS_CoV_2_nsp8	9087	I	TF	1pcFDR	0.0386		1.5267											21.63	1095.39	-3.9	1096.39	1	53.6023	1.5034-1.5198			1	Acetylation (N-term); Beta-methylthiolation	T1:Acetylation (N-term):1001.00;C2:Beta-methylthiolation:1001.00
TCDGTTFTY	T(+42.01)C(+58.01)DGTTFTY	9	SARS_CoV_2_nsp8	9087	I	TF	5pcFDR	0.0386		1.5267											17.35	1107.41	6.6	1108.42	1	44.1481	1.5433-1.5597			2	Acetylation (N-term); Carboxymethyl	T1:Acetylation (N-term):1001.00;C2:Carboxymethyl:1001.00
TCDGTTFTY	TC(+119.00)DGTTFTY	9	SARS_CoV_2_nsp8	9087	II	TF	1pcFDR	0.0386		1.5267											26.7	1126.39	-4.6	1127.4	1	37.406	1.5357-1.5520			2	Cysteinylation	C2:Cysteinylation:1001.00
TCDGTTFTY	TC(+119.00)DGTTFTY	9	SARS_CoV_2_nsp8	9087	I	TF	1pcFDR	0.0386		1.5267											24.32	1126.39	-0.2	1127.4	1	36.9775	1.5211-1.5374			2	Cysteinylation	C2:Cysteinylation:1001.00
TCDGTTFTY	TC(+45.99)DGTTFTY	9	SARS_CoV_2_nsp8	9087	I	TF	1pcFDR	0.0386		1.5267											34	1053.38	-0.7	1054.38	1	54.6521	1.4995-1.5158			3	Beta-methylthiolation	C2:Beta-methylthiolation:1001.00
TCDGTTFTY	TC(+47.98)DGTTFTY	9	SARS_CoV_2_nsp8	9087	I	TF	1pcFDR	0.0386		1.5267											21.33	1055.38	3.2	1056.38	1	44.2382	1.4562-1.4726			1	Cysteine oxidation to cysteic acid	C2:Cysteine oxidation to cysteic acid:1001.00
TCDGTTFTY	TC(+58.01)DGTTFTY	9	SARS_CoV_2_nsp8	9087	I	TF	1pcFDR	0.0386		1.5267											27.28	1065.4	0.5	1066.4	1	43.0691	1.5113-1.5276			2	Carboxymethyl	C2:Carboxymethyl:1001.00
TCDGTTFTY	TCDGTTFTY	9	SARS_CoV_2_nsp8	9087	II	TF	1pcFDR	0.0386		1.5267											31.76	1007.39	0.9	1008.4	1	44.7998	1.4664-1.4828			8
TCDGTTFTY	TCDGTTFTY	9	SARS_CoV_2_nsp8	9087	I	TF	1pcFDR	0.0386		1.5267											25.49	1007.39	-5.8	1008.39	1	44.3592	1.4463-1.4627			12
TDDNALAY	TDDNALAY	8	SARS_CoV_2_nsp9	9087	I	TF	1pcFDR	0.0565													20.43	881.377	-7.3	882.38	1	22.9307	1.3542-1.3707			1
TDDNALAYY	TDDNALAYY	9	SARS_CoV_2_nsp9	9087	I	DD	1pcFDR	0.1978													19.63	1044.44	0.4	1045.44	1	39.3733	1.5117-1.5282			1
TDDNALAYY	TDDNALAYY	9	SARS_CoV_2_nsp9	9087	I	TF	1pcFDR	0.1978													21.72	1044.44	-5.1	1045.45	1	38.1992	1.4844-1.5008			1
TDTPKGPKVKYLY	TDTPKGPKVKYLY	13	SARS_CoV_2_nsp9	9087	I	TF	1pcFDR	1.6781													34.42	1508.82	-4.4	755.418	2	18.6472	1.0161-1.0327	77	1420	1
TGAIKLDDKD	TGAIKLDDKD(-18.01)	10	SARS_CoV_2_N	9087	II	TF	5pcFDR														28.53	1056.55	2.6	1057.55	1	32.9634	1.5288-1.5452			3	Dehydration	D10:Dehydration:24.24
TGAIKLDDKDPNFK	TGAIKLDDKDPNFK	14	SARS_CoV_2_N	9087	II	TF	5pcFDR												2.04	0.17	44.92	1560.81	0.7	781.413	2	37.2411	1.0481-1.0648	3600	69300	5
TGAIKLDDKDPNFKDQ	TGAIKLDDKDPNFKDQ	16	SARS_CoV_2_N	9087	II	DD	1pcFDR												2.2	0.18	30.02	1803.9	-2.4	602.304	3	18.8998	0.8472-0.8639	891	6550	1
TGAIKLDDKDPNFKDQ	TGAIKLDDKDPNFKDQ	16	SARS_CoV_2_N	9087	I	TF	1pcFDR												2.2	0.18	42.03	1803.9	-8.7	902.949	2	32.036	1.0659-1.0825	418	7350	3
TGAIKLDDKDPNFKDQ	TGAIKLDDKDPNFKDQ	16	SARS_CoV_2_N	9087	II	TF	5pcFDR												2.2	0.18	56.62	1803.9	2.5	902.957	2	33.0258	1.1479-1.1645	24700	337000	11
TGPEAGLPYGANK	TGPEAGLPYGANK	13	SARS_CoV_2_N	9004	I	TF	1pcFDR											3.95			30.1	1273.63	2.8	637.824	2	20.5753	0.9195-0.9362	301	7340	1
TGPEAGLPYGANK	TGPEAGLPYGANK	13	SARS_CoV_2_N	9004	II	TF	1pcFDR											3.95			50.11	1273.63	0.6	637.825	2	20.5755	0.9309-0.9476	6780	84200	2
TGPEAGLPYGANKD	TGPEAGLPYGANKD	14	SARS_CoV_2_N	9004	I	TF	1pcFDR											2.39			18.25	1388.66	-5.3	695.332	2	22.1007	0.9228-0.9396	185	3800	1
TGPEAGLPYGANKD	TGPEAGLPYGANKD	14	SARS_CoV_2_N	9004	II	TF	1pcFDR											2.39			22.99	1388.66	-0.4	695.338	2	22.0724	0.9422-0.9590	2260	18900	1
TGPEAGLPYGANKDG	TGPEAGLPYGANKDG	15	SARS_CoV_2_N	9004	I	TF	1pcFDR											3.7			40.13	1445.68	0.8	723.847	2	21.6299	0.9543-0.9710	3910	44700	1
TGPEAGLPYGANKDG	TGPEAGLPYGANKDG	15	SARS_CoV_2_N	9004	II	TF	1pcFDR											3.7			69.47	1445.68	4.7	723.852	2	21.6062	0.9724-0.9891	5000	244000	3
THVQLSLPVLQ	THVQLSLPVLQ	11	SARS_CoV_2_nsp1	9087	I	DD	1pcFDR														26.78	1233.71	0.9	617.86	2	58.1701	0.9420-0.9587	2780	29100	2
THVQLSLPVLQ	THVQLSLPVLQ	11	SARS_CoV_2_nsp1	9004	II	DD	1pcFDR														22.03	1233.71	3.6	617.86	2	58.1925	0.9233-0.9400	246	3280	1
THVQLSLPVLQ	THVQLSLPVLQ	11	SARS_CoV_2_nsp1	9087	II	DD	1pcFDR														28.79	1233.71	0	617.861	2	58.5735	0.9367-0.9533	2030	10600	1
TLGVLVPHV	TLGVLVPHV	9	SARS_CoV_2_nsp1	9004	I	DD	1pcFDR				0.1616										17.52	933.565	4.6	467.789	2	49.5558	0.8185-0.8352			1
TLIVNSVLL	TLIVNSVLL	9	SARS_CoV_2_E	9004	II	TF	5pcFDR				0.7077		0.811								14.74	970.606	-15.7	971.598	1	75.9542	1.5193-1.5358			1
TLIVNSVLL	TLIVNSVLL	9	SARS_CoV_2_E	9004	I	TF	1pcFDR				0.7077		0.811								22.66	970.606	-0.2	971.613	1	75.7631	1.5371-1.5535			5
TMLRKLDNDAL	TMLRKLDNDAL	11	SARS_CoV_2_nsp8	9004	I	TF	1pcFDR														20.98	1288.68	2.9	645.35	2	23.6644	0.9975-1.0142	241	5640	1
TPKGPKVKYLYFIKGLNNLNR	TPKGPKVKYLYFIKGLNNLNR	21	SARS_CoV_2_nsp9	9087	II	TF	1pcFDR														49.06	2462.42	3.2	616.613	4	38.988	0.9361-0.9527	1730	17200	2
TPKGPKVKYLYFIKGLNNLNRG	TPKGPKVKYLYFIKGLNNLNRG	22	SARS_CoV_2_nsp9	9087	II	DD	1pcFDR														33.07	2519.44	-3.8	630.862	4	39.3345	0.9393-0.9560	229	2380	1
TPKGPKVKYLYFIKGLNNLNRG	TPKGPKVKYLYFIKGLNNLNRG	22	SARS_CoV_2_nsp9	9087	II	TF	1pcFDR														51.34	2519.44	2.8	630.868	4	38.9935	0.9414-0.9581	6260	75000	3
TTKGGRFVL	TTKGGRFVL	9	SARS_CoV_2_nsp9	9087	I	TF	5pcFDR		1.5984	1.173			1.4021								17.27	977.566	5	489.794	2	9.1492	0.8374-0.8542			1
TYKNTCDG	TYKNTCDG	8	SARS_CoV_2_nsp8	9004	II	TF	5pcFDR														16.85	900.365	-14.8	901.359	1	25.9304	1.3529-1.3693			1
TYTGAIKLDDKDPNFKDQ	TYTGAIKLDDKDPNFKDQ	18	SARS_CoV_2_N	9087	II	TF	5pcFDR												2.81	0.26	53.14	2068.01	-1	1035.01	2	40.0049	1.2758-1.2923	545	7890	1
VAELEGIQY	VAELEGIQY	9	SARS_CoV_2_nsp1	9087	I	DD	1pcFDR	0.074													22.86	1020.51	2.6	1021.52	1	47.5058	1.4952-1.5117			1
VAELEGIQY	VAELEGIQY	9	SARS_CoV_2_nsp1	9087	II	DD	5pcFDR	0.074													13.46	1020.51	-1.4	1021.52	1	47.9607	1.4952-1.5117			1
VAELEGIQYG	VAELEGIQYG	10	SARS_CoV_2_nsp1	9087	I	DD	1pcFDR														18.41	1077.53	0.8	1078.54	1	43.4956	1.5302-1.5466			1
VAELEGIQYG	VAELEGIQYG	10	SARS_CoV_2_nsp1	9087	II	DD	1pcFDR														30.09	1077.53	-6.7	1078.53	1	43.814	1.5420-1.5585			1
VAKSEFDRDAAMQRKLEK	VAKSEFDRDAAM(+15.99)QRKLEK	18	SARS_CoV_2_nsp8	9087	II	TF	1pcFDR												1.03	0.98	20.5	2137.09	-3.9	713.371	3	18.3472	0.9608-0.9775	497	6450	1	Oxidation (M)	M12:Oxidation (M):1001.00
VDADSKIVQLSEISMDNSPN	VDADSKIVQLSEISM(+15.99)DNSPN	20	SARS_CoV_2_nsp8	9004	II	TF	1pcFDR														54.6	2177.02	3.1	1089.52	2	48.1976	1.1606-1.1772	1170	8470	2	Oxidation (M)	M15:Oxidation (M):1001.00
VDADSKIVQLSEISMDNSPN	VDADSKIVQLSEISMDNSPN	20	SARS_CoV_2_nsp8	9004	II	TF	1pcFDR														51.94	2161.02	-1.2	1081.52	2	57.5188	1.1713-1.1878	1040	10700	2
VEEVLSEARQHLKDG	VEEVLSEARQHLKDG	15	SARS_CoV_2_nsp1	9087	I	DD	1pcFDR													1.19	25.79	1708.87	1.9	570.631	3	24.4218	0.8325-0.8492	941	7830	1
VEEVLSEARQHLKDG	VEEVLSEARQHLKDG	15	SARS_CoV_2_nsp1	9087	II	DD	1pcFDR													1.19	42.95	1708.87	-2.1	855.443	2	24.8455	1.0952-1.1118	2360	22900	2
VEEVLSEARQHLKDGT	VEEVLSEARQHLKDGT	16	SARS_CoV_2_nsp1	9087	II	DD	1pcFDR													1.98	27.97	1809.92	-1.1	604.314	3	26.9212	0.8532-0.8699	1770	17200	1
VGEIPVAY	VGEIPVAY	8	SARS_CoV_2_nsp1	9087	I	DD	5pcFDR														13.8	846.449	1.2	847.454	1	44.8532	1.3783-1.3948			2
VKYLYFIKGLNNLNR	VKYLYFIKGLNNLNR	15	SARS_CoV_2_nsp9	9087	II	TF	1pcFDR									3.89					46.52	1854.05	6.4	619.028	3	47.843	0.9180-0.9347	712	11600	2
VLGSLAATV	VLGSLAAT(-18.01)V	9	SARS_CoV_2_nsp9	9004	I	TF	1pcFDR				0.3752										19.38	811.48	9	812.495	1	44.57	1.4198-1.4363			1	Dehydration	T8:Dehydration:19.46
VLGSLAATV	VLGSLAATV	9	SARS_CoV_2_nsp9	9004	I	DD	1pcFDR				0.3752										20.19	829.491	-2.8	830.492	1	45.6444	1.3565-1.3730			1
VLGSLAATV	VLGSLAATV	9	SARS_CoV_2_nsp9	9004	I	TF	1pcFDR				0.3752										26.09	829.491	1.9	830.5	1	44.6359	1.3967-1.4132			4
VLGSLAATVR	VLGSLAATVR	10	SARS_CoV_2_nsp9	9087	II	DD	1pcFDR														19.34	985.592	4.2	493.803	2	26.9958	0.8452-0.8619	448	6910	1
VLGSLAATVRL	VLGSLAATVRL	11	SARS_CoV_2_nsp9	9087	II	DD	1pcFDR				1.4747										36.72	1098.68	-0.5	550.343	2	53.0134	0.8933-0.9100	1730	11000	1
VLGSLAATVRL	VLGSLAATVRL	11	SARS_CoV_2_nsp9	9004	I	DD	1pcFDR				1.4747										27.02	1098.68	1.1	550.344	2	53.7434	0.8813-0.8980	2670	27900	2
VLGSLAATVRL	VLGSLAATVRL	11	SARS_CoV_2_nsp9	9004	I	TF	1pcFDR				1.4747										28.58	1098.68	4.4	550.348	2	52.4868	0.9080-0.9247			3
VLLPLTQY	VLLPLTQY	8	SARS_CoV_2_nsp4	9087	I	DD	1pcFDR														25.42	945.553	1.2	946.562	1	67.276	1.4840-1.5005			1
VLLPLTQYNRY	VLLPLTQYNRY	11	SARS_CoV_2_nsp4	9087	I	DD	1pcFDR	1.4029													17.62	1378.76	2.3	690.389	2	54.2803	0.9613-0.9780			1
VLLPLTQYNRY	VLLPLTQYNRY	11	SARS_CoV_2_nsp4	9004	II	DD	1pcFDR	1.4029													24.68	1378.76	-0.7	690.385	2	53.9255	0.9455-0.9622	843	8140	1
VLSEARQHL	VLSEARQHL	9	SARS_CoV_2_nsp1	9004	I	DD	5pcFDR		1.1131	1.8453	0.3106		0.207								20.27	1051.58	-4.4	526.791	2	7.6958	0.8779-0.8946	134	2460	1
VLSEARQHLKDG	VLSEARQHLKDG	12	SARS_CoV_2_nsp1	9087	II	DD	1pcFDR														27.51	1351.72	-6.1	676.864	2	24.8469	0.9913-1.0080			2
VLSEARQHLKDGT	VLSEARQHLKDGT	13	SARS_CoV_2_nsp1	9087	II	DD	1pcFDR														18.47	1452.77	-7.8	727.386	2	3.0511	0.9847-1.0013	106	2580	1
VLVPHVGEIPV	VLVPHVGEIPV	11	SARS_CoV_2_nsp1	9004	I	DD	5pcFDR				0.923										13.1	1157.68	5.9	579.848	2	60.8898	0.8940-0.9106			1
VLYQPPQTSITSAVLQ	VLYQPPQTSITSAVLQ	16	SARS_CoV_2_nsp4	9087	I	DD	1pcFDR														25.76	1743.94	-5.6	872.973	2	67.3075	1.1145-1.1311			1
VPHVGEIPV	VPHVGEIPV	9	SARS_CoV_2_nsp1	9004	I	DD	5pcFDR														13.48	945.528	1.6	473.77	2	38.088	0.7997-0.8164			1
VPINTNSSPDDQ	VPINTNSSPDDQ	12	SARS_CoV_2_N	9004	II	TF	1pcFDR														23.1	1285.58	-3.2	643.794	2	15.9144	0.8933-0.9101	314	5480	1
VPINTNSSPDDQIG	VPINTNSSPDDQIG	14	SARS_CoV_2_N	9004	II	TF	5pcFDR											4.07			18.08	1455.68	-1.7	728.85	2	30.2397	0.9623-0.9791	1620	7660	1
VTDTPKGPKVKY	VTDTPKGPKVKY	12	SARS_CoV_2_nsp9	9087	I	TF	1pcFDR	0.0544													23.36	1331.74	1.5	444.924	3	6.8767	0.8233-0.8401	697	10600	1
VTDTPKGPKVKYLY	VTDTPKGPKVKYLY	14	SARS_CoV_2_nsp9	9087	I	TF	1pcFDR	0.081													39.64	1607.89	-14	804.945	2	18.6426	1.0581-1.0747			3
VVDADSKIVQLSEISMDNSPN	VVDADSKIVQLSEISM(+15.99)DNSPN	21	SARS_CoV_2_nsp8	9004	II	TF	1pcFDR														44.03	2276.08	0.7	1139.05	2	50.4357	1.2269-1.2434	69	1360	2	Oxidation (M)	M16:Oxidation (M):1001.00
VVDADSKIVQLSEISMDNSPN	VVDADSKIVQLSEISMDNSPN	21	SARS_CoV_2_nsp8	9004	II	TF	1pcFDR														43.73	2260.09	0.3	1131.05	2	59.3217	1.2249-1.2414	474	11200	3
VYSRVKNLNSSRVPD	VYSRVKNLNSSRVPD	15	SARS_CoV_2_E	9004	I	TF	1pcFDR							1.67							32.81	1732.92	-4.2	578.645	3	10.3145	0.8512-0.8679	290	6130	2
VYSRVKNLNSSRVPD	VYSRVKNLNSSRVPD	15	SARS_CoV_2_E	9004	II	TF	1pcFDR							1.67							56.19	1732.92	4.6	578.651	3	10.2431	0.8472-0.8639	51000	1090000	13
VYSRVKNLNSSRVPDL	VYSRVKNLNSSRVPDL	16	SARS_CoV_2_E	9004	II	TF	1pcFDR							2.37							58.15	1846.01	3.9	616.345	3	21.7972	0.8826-0.8993	2750	37500	3
WPLIVTAL	W(+15.99)PLIVTAL	8	SARS_CoV_2_nsp8	9087	I	TF	5pcFDR		0.8886												16.65	927.543	1.1	928.548	1	98.3432	1.4647-1.4811			7	Oxidation (HW)	W1:Oxidation (HW):1001.00
WPLIVTAL	W(+31.99)PLIVTAL	8	SARS_CoV_2_nsp8	9087	I	TF	5pcFDR		0.8886												14.63	943.538	-2.2	944.54	1	94.8684	1.4949-1.5113			1	Dihydroxy	W1:Dihydroxy:17.01
WPLIVTAL	WPLIVTAL	8	SARS_CoV_2_nsp8	9087	II	TF	1pcFDR		0.8886												37.94	911.548	-3	912.553	1	101.048	1.4461-1.4625			13
WPLIVTAL	WPLIVTAL	8	SARS_CoV_2_nsp8	9087	I	TF	1pcFDR		0.8886												29.25	911.548	-1	912.551	1	101.828	1.4365-1.4529			41
YLYFIKGLNNL	YLYFIKGLNNL	11	SARS_CoV_2_nsp9	9004	I	TF	1pcFDR				0.3994										33.48	1356.74	1.4	679.38	2	70.7299	0.9961-1.0127	449	10800	1
YSRVKNLNSSRVPD	YSRVKNLNSSRVPD	14	SARS_CoV_2_E	9004	I	TF	1pcFDR							1.53							35.34	1633.85	7.2	545.629	3	7.4003	0.8344-0.8512	228	7920	2
YSRVKNLNSSRVPD	YSRVKNLNSSRVPD	14	SARS_CoV_2_E	9004	II	TF	1pcFDR							1.53							48.3	1633.85	7.4	545.629	3	7.1707	0.8398-0.8565	21000	417000	8
YSRVKNLNSSRVPDL	YSRVKNLNSSRVPDL	15	SARS_CoV_2_E	9004	I	TF	1pcFDR							1.95							34.53	1746.94	4.6	583.322	3	18.8619	0.7936-0.8104	49.9	854	1
YSRVKNLNSSRVPDL	YSRVKNLNSSRVPDL	15	SARS_CoV_2_E	9004	II	TF	1pcFDR							1.95							50.34	1746.94	3.2	583.322	3	18.385	0.8585-0.8752	11600	126000	3
YTGAIKLD	YTGAIKLD(-18.01)	8	SARS_CoV_2_N	9087	II	TF	5pcFDR														31.37	861.46	-4.7	862.46	1	37.2266	1.3881-1.4045			2	Dehydration	D8:Dehydration:90.85
YTGAIKLDDKD	YTGAIKLDDKD(-18.01)	11	SARS_CoV_2_N	9087	II	TF	5pcFDR														28.14	1219.61	-2.6	610.808	2	38.4332	0.9454-0.9621	1020	14600	2	Dehydration	D11:Dehydration:0.00
YTGAIKLDDKDPNFK	YTGAIKLDDKDPNFK	15	SARS_CoV_2_N	9087	I	TF	1pcFDR												2.11	0.17	33.44	1723.88	10.4	575.639	3	30.9999	0.8436-0.8604	178	3500	1
YTGAIKLDDKDPNFK	YTGAIKLDDKDPNFK	15	SARS_CoV_2_N	9087	II	TF	5pcFDR												2.11	0.17	13.24	1723.88	-1.9	862.942	2	37.2315	1.1134-1.1300	2090	24100	1
YTGAIKLDDKDPNFKD	YTGAIKLDDKDPNFKD	16	SARS_CoV_2_N	9087	II	TF	5pcFDR												1.88	0.12	52.83	1838.9	-7.1	920.451	2	38.3058	1.1731-1.1897			1
YTGAIKLDDKDPNFKD	YTGAIKLDDKDPNFKD(-18.01)	16	SARS_CoV_2_N	9087	II	TF	5pcFDR												1.88	0.12	31.21	1820.89	-3.4	911.449	2	37.2781	1.1844-1.2010	3010	24600	1	Dehydration	D16:Dehydration:37.78
YTGAIKLDDKDPNFKDQ	YTGAIKLDDKDPNFKDQ	17	SARS_CoV_2_N	9087	II	DD	1pcFDR												2.36	0.19	51.73	1966.96	2.4	656.661	3	24.2726	0.8913-0.9080	2710	20100	2
YTGAIKLDDKDPNFKDQ	YTGAIKLDDKDPNFKDQ	17	SARS_CoV_2_N	9087	I	TF	1pcFDR												2.36	0.19	58.45	1966.96	3.9	656.664	3	32.0611	0.8799-0.8967	11000	139000	7
YTGAIKLDDKDPNFKDQ	YTGAIKLDDKDPNFKDQ	17	SARS_CoV_2_N	9087	II	TF	5pcFDR												2.36	0.19	66.32	1966.96	3.3	656.662	3	38.4408	0.8865-0.9032	56500	1550000	16
YTGAIKLDDKDPNFKDQVIL	YTGAIKLDDKDPNFKDQVIL	20	SARS_CoV_2_N	9087	II	DD	1pcFDR													0.87	28.93	2292.2	-4.1	765.068	3	50.6809	0.9713-0.9880	765	12600	2
YTGAIKLDDKDPNFKDQVILLNKHID	YTGAIKLDDKDPNFKDQVILLNKHID	26	SARS_CoV_2_N	9087	II	TF	5pcFDR													1.14	21.63	3012.59	-4.4	754.15	4	63.3641	1.0041-1.0208			1
YVYSRVKNL	YVYSRVKNL	9	SARS_CoV_2_E	9087	I	TF	1pcFDR		0.0192	0.1214	0.3948		0.2164								23.84	1140.63	4.2	571.323	2	12.3989	0.9292-0.9459	7330	120000	1
YVYSRVKNLNSSRVPD	YVYSRVKNLNSSRVPD	16	SARS_CoV_2_E	9004	II	TF	1pcFDR							2.38							47.76	1895.99	2.6	633.004	3	17.1899	0.8986-0.9153	1210	21700	2
YYNTTKGGRF	YYN(+0.98)TTKGGRF	10	SARS_CoV_2_nsp9	9004	I	TF	1pcFDR														33.46	1206.57	4.4	604.293	2	9.0987	0.9380-0.9547	240	6800	1	Deamidation (NQ)	N3:Deamidation (NQ):1001.00
